# Supplementary material for: A CpG island-encoded mechanism protects genes from premature transcription termination
Source: PubMed Central journal article supplement (PMC9911701; doi:10.1038/s41467-023-36236-2), 2023-02-09
Supplement: 41467_2023_36236_MOESM3_ESM.pdf [file 41467_2023_36236_MOESM3_ESM.pdf]

## Descriptions of additional supplementary files

### **Supplementary Data 1**

Total numbers of uniquely mapped, non-duplicate reads for mouse and spike-in genomes from all cRNA-seq, cTT-seq and cChIP-seq experiments performed in this study.
